# Supplementary material for: trans-FeII(H)2(diphosphine)(diamine) complexes as alternative catalysts for the asymmetric hydrogenation of ketones? A DFT study
Source: Royal Society of Chemistry journal article supplement (doi:10.1039/c0dt00820f), 2010-11-24
Supplement: c0dt00820f.pdf [file c0dt00820f.pdf]

# ***trans*-Fe<sup>II</sup>(H)<sub>2</sub>(diphosphine)(diamine) complexes as alternative catalysts for the asymmetric hydrogenation of ketones? A DFT study**

Hsin-Yi Tiffany Chen<sup>a</sup>, Devis Di Tommaso<sup>b</sup>, Graeme Hogarth<sup>b</sup>, and C. Richard A. Catlow<sup>a\*</sup>

<sup>a</sup>*Kathleen Lonsdale Building, Department of Chemistry, University College London, Gower Street, London, WC1E 6BT, United Kingdom*

<sup>b</sup>*Department of Chemistry, Christopher Ingold Laboratories, University College London, 20 Gordon Street, London, WC1H 0AJ, United Kingdom*

\* Authors to whom correspondence should be addressed. E-mail: [c.r.a.catlow@ucl.ac.uk](mailto:c.r.a.catlow@ucl.ac.uk)

## ***Supporting Computational Data***

Due to the large number of atoms in the optimized structures it is unfeasible to present XYZ coordinates in the table format. Instead, we have included all necessary XYZ files in the Zip- archive. The content of tables is as follows:

### ***Table of Content***

#### **A. Based on Table 1: Comparison of Structural Conformations.....2**

**Table A** Electronic energies between the *trans*- and *cis*- isomers of the [M<sup>II</sup>(H)<sub>2</sub>(S,S-dpen)(S-xylBINAP)] and [M<sup>II</sup>(H)<sub>2</sub>(S,S-dpen)(S-BINAP)] complexes, where M = Ru and Fe.

#### **B. Based on Table 2: Comparison of Spin States.....3**

**Table B** Electronic energies of the *trans*-[Ru<sup>II</sup>(H)<sub>2</sub>(S,S-dpen)(S-xylbinap)] and *trans*-[Fe<sup>II</sup>(H)<sub>2</sub>(S,S-dpen)(S-xylbinap)] complexes with S=0, 2, and 4.

#### **C. Based on Table 3 and Figure 2: Whole Catalytic Cycles in Simplified Systems.....4**

**Table C** The electric energies (in hartrees) of reactant, TS, and product for the H<sub>2</sub>-hydrogenation of acetone catalysed by *trans*-[M<sup>II</sup>(H)<sub>2</sub>(PH<sub>3</sub>)<sub>2</sub>(en)] model catalysts, where M = Ru and Fe.

#### **D. Based on Figure 5: H<sub>2</sub>-Transfer in Real Systems.....6**

## A. Based on Table 1: Comparison of Structural Conformations

**Table A** Electronic energies between the *trans*- and *cis*- isomers of the [M(H)<sub>2</sub>(S-xylbinap)(S,S-dpen)] and [M(H)<sub>2</sub>(S-BINAP)(S,S-dpen)] complexes, where M = Ru and Fe.

| Level of Theory | Basis Set            | Ru <sup>II</sup> (H) <sub>2</sub> (diphosphine)(S,S-dpen) |                | Fe <sup>II</sup> (H) <sub>2</sub> (diphosphine)(S,S-dpen) |                |                |
|-----------------|----------------------|-----------------------------------------------------------|----------------|-----------------------------------------------------------|----------------|----------------|
|                 |                      | XylBINAP                                                  | BINAP          | XylBINAP                                                  | BINAP          |                |
| E [hartrees]    |                      |                                                           |                |                                                           |                |                |
| PBE             | DNP                  | <i>trans</i>                                              | -3470.30091370 | -3156.09229030                                            | -3487.56174970 | -3173.35331800 |
|                 |                      | <i>cis</i>                                                | -3470.29373690 | -3156.08585710                                            | -3487.54886050 | -3173.34191670 |
| PBE             | 6-31G **/<br>LANL2DZ | <i>trans</i>                                              | -3437.22883146 | -3123.12551219                                            | -3466.73778810 | -3152.63437597 |
|                 |                      | <i>cis</i>                                                | -3437.22531492 | -3123.12230077                                            | -3466.73189327 | -3152.62862365 |
| PBE0            | 6-31G **/<br>LANL2DZ | <i>trans</i>                                              | -3437.60051060 | -3123.42781561                                            | -3467.05788122 | -3152.88512492 |
|                 |                      | <i>cis</i>                                                | -3437.59421349 | -3123.42183393                                            | -3467.04447814 | -3152.87192947 |
| B3LYP           | 6-31G **/<br>LANL2DZ | <i>trans</i>                                              | -3441.02152492 | -3126.46293057                                            | -3470.52370552 | -3155.96495900 |
|                 |                      | <i>cis</i>                                                | -3441.01676916 | -3126.45879427                                            | -3470.51062337 | -3155.95234981 |

Below are relative XYZ files, shown in the attached Zip-archive.

### A-1 DMol<sup>3</sup>/PBE/DNP

- A11. *trans*-[Ru<sup>II</sup>(H)<sub>2</sub>(S-XylBINAP)(S,S-dpen)]
- A12. *cis*-[Ru<sup>II</sup>(H)<sub>2</sub>(S-XylBINAP)(S,S-dpen)]
- A13. *trans*-[Ru<sup>II</sup>(H)<sub>2</sub>(S-BINAP)(S,S-dpen)]
- A14. *cis*-[Ru<sup>II</sup>(H)<sub>2</sub>(S-BINAP)(S,S-dpen)]
- A15. *trans*-[Fe<sup>II</sup>(H)<sub>2</sub>(S-XylBINAP)(S,S-dpen)]
- A16. *cis*-[Fe<sup>II</sup>(H)<sub>2</sub>(S-XylBINAP)(S,S-dpen)]
- A17. *trans*-[Fe<sup>II</sup>(H)<sub>2</sub>(S-BINAP)(S,S-dpen)]
- A18. *cis*-[Fe<sup>II</sup>(H)<sub>2</sub>(S-BINAP)(S,S-dpen)]

### A-2 Gaussian03/PBE/6-31G\*\*/LANL2DZ

- A21. *trans*-[Ru<sup>II</sup>(H)<sub>2</sub>(S-XylBINAP)(S,S-dpen)]
- A22. *cis*-[Ru<sup>II</sup>(H)<sub>2</sub>(S-XylBINAP)(S,S-dpen)]
- A23. *trans*-[Ru<sup>II</sup>(H)<sub>2</sub>(S-BINAP)(S,S-dpen)]
- A24. *cis*-[Ru<sup>II</sup>(H)<sub>2</sub>(S-BINAP)(S,S-dpen)]
- A25. *trans*-[Fe<sup>II</sup>(H)<sub>2</sub>(S-XylBINAP)(S,S-dpen)]
- A26. *cis*-[Fe<sup>II</sup>(H)<sub>2</sub>(S-XylBINAP)(S,S-dpen)]
- A27. *trans*-[Fe<sup>II</sup>(H)<sub>2</sub>(S-BINAP)(S,S-dpen)]
- A28. *cis*-[Fe<sup>II</sup>(H)<sub>2</sub>(S-BINAP)(S,S-dpen)]

### A-3 Gaussian03/PBE0/6-31G\*\*/LANL2DZ

- A31. *trans*-[Ru<sup>II</sup>(H)<sub>2</sub>(*S*-XylBINAP)(*S,S*-dpen)]  
A32. *cis*-[Ru<sup>II</sup>(H)<sub>2</sub>(*S*-XylBINAP)(*S,S*-dpen)]  
A33. *trans*-[Ru<sup>II</sup>(H)<sub>2</sub>(*S*-BINAP)(*S,S*-dpen)]  
A34. *cis*-[Ru<sup>II</sup>(H)<sub>2</sub>(*S*-BINAP)(*S,S*-dpen)]  
A35. *trans*-[Fe<sup>II</sup>(H)<sub>2</sub>(*S*-XylBINAP)(*S,S*-dpen)]  
A36. *cis*-[Fe<sup>II</sup>(H)<sub>2</sub>(*S*-XylBINAP)(*S,S*-dpen)]  
A37. *trans*-[Fe<sup>II</sup>(H)<sub>2</sub>(*S*-BINAP)(*S,S*-dpen)]  
A38. *cis*-[Fe<sup>II</sup>(H)<sub>2</sub>(*S*-BINAP)(*S,S*-dpen)]

### A-4 Gaussian03/B3LYP/6-31G\*\*/LANL2DZ

- A41. *trans*-[Ru<sup>II</sup>(H)<sub>2</sub>(*S*-XylBINAP)(*S,S*-dpen)]  
A42. *cis*-[Ru<sup>II</sup>(H)<sub>2</sub>(*S*-XylBINAP)(*S,S*-dpen)]  
A43. *trans*-[Ru<sup>II</sup>(H)<sub>2</sub>(*S*-BINAP)(*S,S*-dpen)]  
A44. *cis*-[Ru<sup>II</sup>(H)<sub>2</sub>(*S*-BINAP)(*S,S*-dpen)]  
A45. *trans*-[Fe<sup>II</sup>(H)<sub>2</sub>(*S*-XylBINAP)(*S,S*-dpen)]  
A46. *cis*-[Fe<sup>II</sup>(H)<sub>2</sub>(*S*-XylBINAP)(*S,S*-dpen)]  
A47. *trans*-[Fe<sup>II</sup>(H)<sub>2</sub>(*S*-BINAP)(*S,S*-dpen)]  
A48. *cis*-[Fe<sup>II</sup>(H)<sub>2</sub>(*S*-BINAP)(*S,S*-dpen)]

## B. Based on Table 2: Comparison of Spin States

**Table B** Electronic energies of the *trans*-[Ru<sup>II</sup>(H)<sub>2</sub>(*S*-xylbinap)(*S,S*-dpen)] and *trans*-[Fe<sup>II</sup>(H)<sub>2</sub>(*S*-xylbinap)(*S,S*-dpen)] complexes with S=0, 2, and 4.

| Spin Multiplicity | Ru-XylBINAP   | Fe-XylBINAP   |
|-------------------|---------------|---------------|
|                   | E [hartrees]  |               |
| Singlet           | -3470.2639053 | -3487.5236447 |
| Triplet           | -3470.1966383 | -3487.4802138 |
| Quintet           | -3470.1077703 | -3487.4320404 |

Below are relative XYZ files, shown in the attached Zip-archive.

### B. DMol<sup>3</sup>/PBE/DNP

- B1. *trans*-[Ru<sup>II</sup>(H)<sub>2</sub>(*S*-xylbinap)(*S,S*-dpen)] – Singlet  
B2. *trans*-[Ru<sup>II</sup>(H)<sub>2</sub>(*S*-xylbinap)(*S,S*-dpen)] – Triplet  
B3. *trans*-[Ru<sup>II</sup>(H)<sub>2</sub>(*S*-xylbinap)(*S,S*-dpen)] – Quintet  
  
B4. *trans*-[Fe<sup>II</sup>(H)<sub>2</sub>(*S*-xylbinap)(*S,S*-dpen)] – Singlet  
B5. *trans*-[Fe<sup>II</sup>(H)<sub>2</sub>(*S*-xylbinap)(*S,S*-dpen)] – Triplet  
B6. *trans*-[Fe<sup>II</sup>(H)<sub>2</sub>(*S*-xylbinap)(*S,S*-dpen)] – Quintet

### C. Based on Table 3 and Figure 2: Whole Catalytic Cycles in Simplified Systems

**Table C** The electric energies (in hartrees) of reactant, TS, and product for the H<sub>2</sub>-hydrogenation of acetone catalysed by *trans*-[M<sup>II</sup>(H)<sub>2</sub>(PH<sub>3</sub>)<sub>2</sub>(en)] model catalysts, where M = Ru and Fe.

| Functional                                  | PBE            | PBE            | PBE0           | B3LYP          | mPW1PW91       |
|---------------------------------------------|----------------|----------------|----------------|----------------|----------------|
| Basis Set                                   | DNP            | 6-31G **       | 6-31G **       | 6-31G **       | 6-31G**        |
|                                             | N/A            | LAND2DZ        | LAND2DZ        | LAND2DZ        | SDD            |
| E <sub>Ru, H<sub>2</sub>-Transfer,Rac</sub> | -1164.26200780 | -1196.55122960 | -1164.34210311 | -1165.12374393 | -1166.09124300 |
| E <sub>Ru, H<sub>2</sub>-Transfer,TS</sub>  | -1164.25858000 | -1196.55473000 | -1164.33769000 | -1165.11832938 | -1166.08696625 |
| E <sub>Ru, H<sub>2</sub>-Transfer,Pro</sub> | -1164.27783649 | -1196.56547550 | -1164.35729089 | -1165.13677073 | -1166.10291681 |
| E <sub>Ru, H<sub>2</sub>-Split,Rac</sub>    | -1003.52607400 | -971.31812421  | -971.37115790  | -971.93508966  | -972.94276847  |
| E <sub>Ru, H<sub>2</sub>-Split,TS</sub>     | -1003.51106900 | -971.30260316  | -971.35777253  | -971.91315786  | -972.92892000  |
| E <sub>Ru, H<sub>2</sub>-Split,Pro</sub>    | -1003.54132350 | -971.33261145  | -971.39466548  | -971.94956287  | -972.96704523  |
| E <sub>Fe, H<sub>2</sub>-Transfer,Rac</sub> | -1213.81182060 | -1193.77010136 | -1193.79858433 | -1194.62549177 | -1195.00752196 |
| E <sub>Fe, H<sub>2</sub>-Transfer,TS</sub>  | -1213.80860000 | -1193.76692000 | -1193.79475000 | -1194.62043710 | -1195.00382898 |
| E <sub>Fe, H<sub>2</sub>-Transfer,Pro</sub> | -1213.82691190 | -1193.78690418 | -1193.81450050 | -1194.64003965 | -1195.02283078 |
| E <sub>Fe, H<sub>2</sub>-Split,Rac</sub>    | -1020.79219140 | -1000.83011247 | -1000.83141714 | -1001.43909777 | -1001.86446393 |
| E <sub>Fe, H<sub>2</sub>-Split,TS</sub>     | -1020.77919000 | -1000.81538361 | -1000.81856000 | -1001.41870838 | -1001.85085000 |
| E <sub>Fe, H<sub>2</sub>-Split,Pro</sub>    | -1020.80302440 | -1000.84137447 | -1000.85190975 | -1001.45212437 | -1001.88441044 |

- $\Delta E_{M, H_2\text{-Transfer},X}$  is the electric energy hydrogen transfers in the acetone/isopropanol reaction catalysed by the 18-electron hydride-amino metal complex;
- $\Delta E_{M, H_2\text{-Split},X}$  is the electric energy for the heterolytic dihydrogen splitting on the 16-electron hydrido-amido metal complex.
- M = Ru and Fe; X = Rac, TS, and Pro which stand for Reactant, Transition-State Structure, and Product, respectively.

Below are relative XYZ files, shown in the attached Zip-archive.

#### C-1 DMol<sup>3</sup>/PBE/DNP

C11Ru-Re. *trans*-[Ru<sup>II</sup>M(H)<sub>2</sub>(PH<sub>3</sub>)<sub>2</sub>(en)] H<sub>2</sub>-Transfer,Rac  
 C11Ru-TS. *trans*-[Ru<sup>II</sup>M(H)<sub>2</sub>(PH<sub>3</sub>)<sub>2</sub>(en)] H<sub>2</sub>-Transfer,TS  
 C11Ru-Pr. *trans*-[Ru<sup>II</sup>M(H)<sub>2</sub>(PH<sub>3</sub>)<sub>2</sub>(en)] H<sub>2</sub>-Transfer,Pro  
 C12Ru-Re. *trans*-[Ru<sup>II</sup>M(H)<sub>2</sub>(PH<sub>3</sub>)<sub>2</sub>(en)] H<sub>2</sub>-Split,Rac  
 C12Ru-TS. *trans*-[Ru<sup>II</sup>M(H)<sub>2</sub>(PH<sub>3</sub>)<sub>2</sub>(en)] H<sub>2</sub>-Split,TS  
 C12Ru-Pr. *trans*-[Ru<sup>II</sup>M(H)<sub>2</sub>(PH<sub>3</sub>)<sub>2</sub>(en)] H<sub>2</sub>-Split,Pro

C11Fe. *trans*-[Fe<sup>II</sup>M(H)<sub>2</sub>(PH<sub>3</sub>)<sub>2</sub>(en)] H<sub>2</sub>-Transfer,Rac  
C11Fe. *trans*-[Fe<sup>II</sup>M(H)<sub>2</sub>(PH<sub>3</sub>)<sub>2</sub>(en)] H<sub>2</sub>-Transfer,TS  
C11Fe. *trans*-[Fe<sup>II</sup>M(H)<sub>2</sub>(PH<sub>3</sub>)<sub>2</sub>(en)] H<sub>2</sub>-Transfer,Pro  
C12Fe. *trans*-[Fe<sup>II</sup>M(H)<sub>2</sub>(PH<sub>3</sub>)<sub>2</sub>(en)] H<sub>2</sub>-Split,Rac  
C12Fe. *trans*-[Fe<sup>II</sup>M(H)<sub>2</sub>(PH<sub>3</sub>)<sub>2</sub>(en)] H<sub>2</sub>-Split,TS  
C12Fe. *trans*-[Fe<sup>II</sup>M(H)<sub>2</sub>(PH<sub>3</sub>)<sub>2</sub>(en)] H<sub>2</sub>-Split,Pro

### **C-2 Gaussian03/PBE/6-31G\*\*/LANL2DZ**

C21Ru-Re. *trans*-[Ru<sup>II</sup>M(H)<sub>2</sub>(PH<sub>3</sub>)<sub>2</sub>(en)] H<sub>2</sub>-Transfer,Rac  
C21Ru-TS. *trans*-[Ru<sup>II</sup>M(H)<sub>2</sub>(PH<sub>3</sub>)<sub>2</sub>(en)] H<sub>2</sub>-Transfer,TS  
C21Ru-Pr. *trans*-[Ru<sup>II</sup>M(H)<sub>2</sub>(PH<sub>3</sub>)<sub>2</sub>(en)] H<sub>2</sub>-Transfer,Pro  
C22Ru-Re. *trans*-[Ru<sup>II</sup>M(H)<sub>2</sub>(PH<sub>3</sub>)<sub>2</sub>(en)] H<sub>2</sub>-Split,Rac  
C22Ru-TS. *trans*-[Ru<sup>II</sup>M(H)<sub>2</sub>(PH<sub>3</sub>)<sub>2</sub>(en)] H<sub>2</sub>-Split,TS  
C22Ru-Pr. *trans*-[Ru<sup>II</sup>M(H)<sub>2</sub>(PH<sub>3</sub>)<sub>2</sub>(en)] H<sub>2</sub>-Split,Pro

C21Fe. *trans*-[Fe<sup>II</sup>M(H)<sub>2</sub>(PH<sub>3</sub>)<sub>2</sub>(en)] H<sub>2</sub>-Transfer,Rac  
C21Fe. *trans*-[Fe<sup>II</sup>M(H)<sub>2</sub>(PH<sub>3</sub>)<sub>2</sub>(en)] H<sub>2</sub>-Transfer,TS  
C21Fe. *trans*-[Fe<sup>II</sup>M(H)<sub>2</sub>(PH<sub>3</sub>)<sub>2</sub>(en)] H<sub>2</sub>-Transfer,Pro  
C22Fe. *trans*-[Fe<sup>II</sup>M(H)<sub>2</sub>(PH<sub>3</sub>)<sub>2</sub>(en)] H<sub>2</sub>-Split,Rac  
C22Fe. *trans*-[Fe<sup>II</sup>M(H)<sub>2</sub>(PH<sub>3</sub>)<sub>2</sub>(en)] H<sub>2</sub>-Split,TS  
C22Fe. *trans*-[Fe<sup>II</sup>M(H)<sub>2</sub>(PH<sub>3</sub>)<sub>2</sub>(en)] H<sub>2</sub>-Split,Pro

### **C-3 Gaussian03/PBE0/6-31G\*\*/LANL2DZ**

C31Ru-Re. *trans*-[Ru<sup>II</sup>M(H)<sub>2</sub>(PH<sub>3</sub>)<sub>2</sub>(en)] H<sub>2</sub>-Transfer,Rac  
C31Ru-TS. *trans*-[Ru<sup>II</sup>M(H)<sub>2</sub>(PH<sub>3</sub>)<sub>2</sub>(en)] H<sub>2</sub>-Transfer,TS  
C31Ru-Pr. *trans*-[Ru<sup>II</sup>M(H)<sub>2</sub>(PH<sub>3</sub>)<sub>2</sub>(en)] H<sub>2</sub>-Transfer,Pro  
C32Ru-Re. *trans*-[Ru<sup>II</sup>M(H)<sub>2</sub>(PH<sub>3</sub>)<sub>2</sub>(en)] H<sub>2</sub>-Split,Rac  
C32Ru-TS. *trans*-[Ru<sup>II</sup>M(H)<sub>2</sub>(PH<sub>3</sub>)<sub>2</sub>(en)] H<sub>2</sub>-Split,TS  
C32Ru-Pr. *trans*-[Ru<sup>II</sup>M(H)<sub>2</sub>(PH<sub>3</sub>)<sub>2</sub>(en)] H<sub>2</sub>-Split,Pro

C31Fe. *trans*-[Fe<sup>II</sup>M(H)<sub>2</sub>(PH<sub>3</sub>)<sub>2</sub>(en)] H<sub>2</sub>-Transfer,Rac  
C31Fe. *trans*-[Fe<sup>II</sup>M(H)<sub>2</sub>(PH<sub>3</sub>)<sub>2</sub>(en)] H<sub>2</sub>-Transfer,TS  
C31Fe. *trans*-[Fe<sup>II</sup>M(H)<sub>2</sub>(PH<sub>3</sub>)<sub>2</sub>(en)] H<sub>2</sub>-Transfer,Pro  
C32Fe. *trans*-[Fe<sup>II</sup>M(H)<sub>2</sub>(PH<sub>3</sub>)<sub>2</sub>(en)] H<sub>2</sub>-Split,Rac  
C32Fe. *trans*-[Fe<sup>II</sup>M(H)<sub>2</sub>(PH<sub>3</sub>)<sub>2</sub>(en)] H<sub>2</sub>-Split,TS  
C32Fe. *trans*-[Fe<sup>II</sup>M(H)<sub>2</sub>(PH<sub>3</sub>)<sub>2</sub>(en)] H<sub>2</sub>-Split,Pro

### **C-4 Gaussian03/B3LYP/6-31G\*\*/LANL2DZ**

C41Ru-Re. *trans*-[Ru<sup>II</sup>M(H)<sub>2</sub>(PH<sub>3</sub>)<sub>2</sub>(en)] H<sub>2</sub>-Transfer,Rac  
C41Ru-TS. *trans*-[Ru<sup>II</sup>M(H)<sub>2</sub>(PH<sub>3</sub>)<sub>2</sub>(en)] H<sub>2</sub>-Transfer,TS  
C41Ru-Pr. *trans*-[Ru<sup>II</sup>M(H)<sub>2</sub>(PH<sub>3</sub>)<sub>2</sub>(en)] H<sub>2</sub>-Transfer,Pro  
C42Ru-Re. *trans*-[Ru<sup>II</sup>M(H)<sub>2</sub>(PH<sub>3</sub>)<sub>2</sub>(en)] H<sub>2</sub>-Split,Rac  
C42Ru-TS. *trans*-[Ru<sup>II</sup>M(H)<sub>2</sub>(PH<sub>3</sub>)<sub>2</sub>(en)] H<sub>2</sub>-Split,TS  
C42Ru-Pr. *trans*-[Ru<sup>II</sup>M(H)<sub>2</sub>(PH<sub>3</sub>)<sub>2</sub>(en)] H<sub>2</sub>-Split,Pro

C41Fe. *trans*-[Fe<sup>II</sup>M(H)<sub>2</sub>(PH<sub>3</sub>)<sub>2</sub>(en)] H<sub>2</sub>-Transfer,Rac  
C41Fe. *trans*-[Fe<sup>II</sup>M(H)<sub>2</sub>(PH<sub>3</sub>)<sub>2</sub>(en)] H<sub>2</sub>-Transfer,TS  
C41Fe. *trans*-[Fe<sup>II</sup>M(H)<sub>2</sub>(PH<sub>3</sub>)<sub>2</sub>(en)] H<sub>2</sub>-Transfer,Pro  
C42Fe. *trans*-[Fe<sup>II</sup>M(H)<sub>2</sub>(PH<sub>3</sub>)<sub>2</sub>(en)] H<sub>2</sub>-Split,Rac  
C42Fe. *trans*-[Fe<sup>II</sup>M(H)<sub>2</sub>(PH<sub>3</sub>)<sub>2</sub>(en)] H<sub>2</sub>-Split,TS  
C42Fe. *trans*-[Fe<sup>II</sup>M(H)<sub>2</sub>(PH<sub>3</sub>)<sub>2</sub>(en)] H<sub>2</sub>-Split,Pro

### **C-5 Gaussian03/B3LYP/6-31G\*\*/SDD**

C51Ru-Re. *trans*-[Ru<sup>II</sup>M(H)<sub>2</sub>(PH<sub>3</sub>)<sub>2</sub>(en)] H<sub>2</sub>-Transfer,Rac  
C51Ru-TS. *trans*-[Ru<sup>II</sup>M(H)<sub>2</sub>(PH<sub>3</sub>)<sub>2</sub>(en)] H<sub>2</sub>-Transfer,TS  
C51Ru-Pr. *trans*-[Ru<sup>II</sup>M(H)<sub>2</sub>(PH<sub>3</sub>)<sub>2</sub>(en)] H<sub>2</sub>-Transfer,Pro  
C52Ru-Re. *trans*-[Ru<sup>II</sup>M(H)<sub>2</sub>(PH<sub>3</sub>)<sub>2</sub>(en)] H<sub>2</sub>-Split,Rac  
C52Ru-TS. *trans*-[Ru<sup>II</sup>M(H)<sub>2</sub>(PH<sub>3</sub>)<sub>2</sub>(en)] H<sub>2</sub>-Split,TS  
C52Ru-Pr. *trans*-[Ru<sup>II</sup>M(H)<sub>2</sub>(PH<sub>3</sub>)<sub>2</sub>(en)] H<sub>2</sub>-Split,Pro

C51Fe. *trans*-[Fe<sup>II</sup>M(H)<sub>2</sub>(PH<sub>3</sub>)<sub>2</sub>(en)] H<sub>2</sub>-Transfer,Rac  
C51Fe. *trans*-[Fe<sup>II</sup>M(H)<sub>2</sub>(PH<sub>3</sub>)<sub>2</sub>(en)] H<sub>2</sub>-Transfer,TS  
C51Fe. *trans*-[Fe<sup>II</sup>M(H)<sub>2</sub>(PH<sub>3</sub>)<sub>2</sub>(en)] H<sub>2</sub>-Transfer,Pro  
C52Fe. *trans*-[Fe<sup>II</sup>M(H)<sub>2</sub>(PH<sub>3</sub>)<sub>2</sub>(en)] H<sub>2</sub>-Split,Rac  
C52Fe. *trans*-[Fe<sup>II</sup>M(H)<sub>2</sub>(PH<sub>3</sub>)<sub>2</sub>(en)] H<sub>2</sub>-Split,TS  
C52Fe. *trans*-[Fe<sup>II</sup>M(H)<sub>2</sub>(PH<sub>3</sub>)<sub>2</sub>(en)] H<sub>2</sub>-Split,Pro

### **D. Based on Figure 5: H<sub>2</sub>-Transfer in Real Systems**

There are seven real structures in the Ru system and Fe systems, respectively. The XYZ files are shown in the attached Zip-archive.

#### **D. DMol<sup>3</sup>/PBE/DNP**

D01. [Acetophenone + 18e- dihydride-amino Ru<sup>II</sup> complex]  
D02. INT-I<sub>Ru</sub>  
D03. INT-II<sub>Ru</sub>  
D04. Hydrog. TS<sub>Ru</sub>  
D05. ADDUCT-I<sub>Ru</sub>  
D06. ADDUCT-II<sub>Ru</sub>  
D07. [Phenylenthanol + 16e- hydrido-amido Ru<sup>II</sup> complex]  
  
D08. [Acetophenone + 18e- dihydride-amino Fe<sup>II</sup> complex]  
D09. INT-I<sub>Fe</sub>  
D10. INT-II<sub>Fe</sub>  
D11. Hydrog. TS<sub>Fe</sub>  
D12. ADDUCT-I<sub>Fe</sub>  
D13. ADDUCT-II<sub>Fe</sub>  
D14. [Phenylenthanol + 16e- hydrido-amido Fe<sup>II</sup> complex]
